# Supplementary material for: A SILAC-based Approach Identifies Substrates of Caspase-dependent Cleavage upon TRAIL-induced Apoptosis
Source: PubMed Central journal article supplement (PMC3650350; doi:10.1074/mcp.m112.024679), 2013-01-13
Supplement: supp_M112.024679_mcp.M112.024679-6.pdf [file supp_M112.024679_mcp.M112.024679-6.pdf]

# Table of Content:

## 1. Supplemental Figures

### Figure S1

Background information on the experiments and algorithm.

### Figure S2

Characterization of the substrate population.

### Figure S3

Investigation of the uncleaved ratio distribution of cleaved substrates.

### Figure S4

STRING analysis of known and novel substrates.

### Figure S5

3D cleavage plots for components of the condensin I complex.

### Figure S6

Cleavage of proteasomal proteins.

## 2. Supplemental Information

Instructions on how to use MaxQB for visualizing and extracting cleavage information.

## 3. Supplemental Tables

### Supplemental Table S1:

Excel Table containing all substrates including 3D cleavage plots, cleavage statistics, uncleaved and cleaved ratios, sequence coverages and explicit site information.

### Supplemental Table S2:

List of all known human cleavage substrates as defined within the text.

### Supplemental Table S3:

Table containing substrates with cleavage site information (related to Figure 5C).

### Supplemental Table S4:

Excel Table with all substrates including additional categorical information.

### Supplemental Table S5:

Output tables of the Fisher Exact Testing for enrichment within the substrate populations for experiments M1, M2, M3.

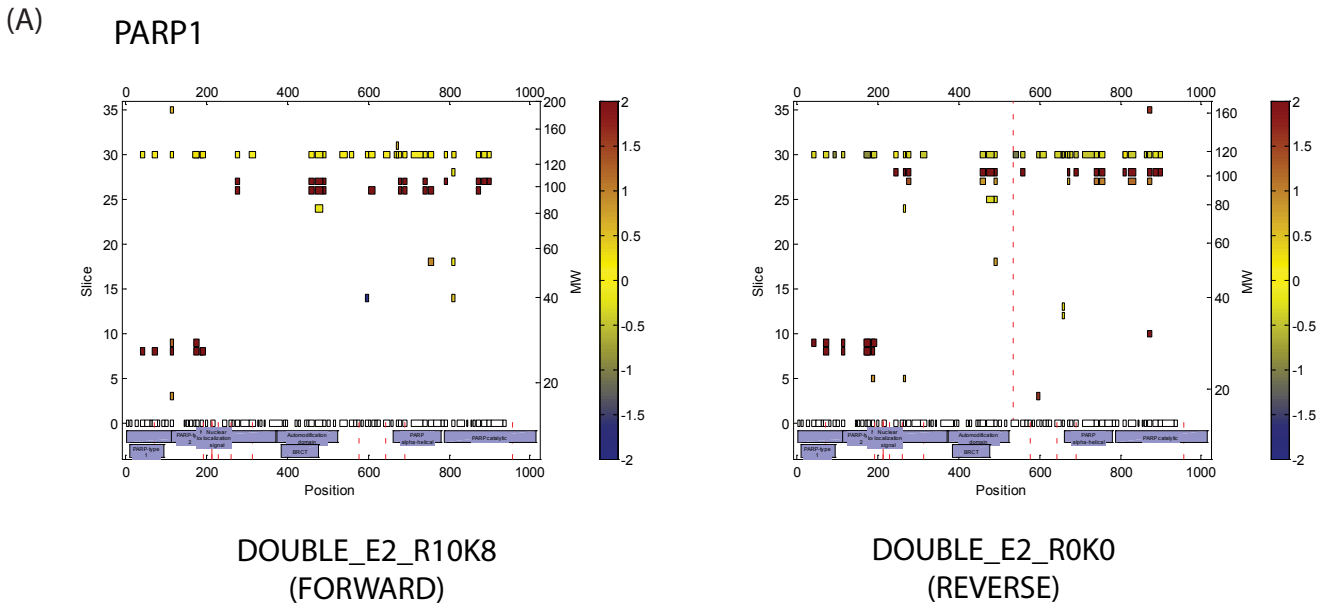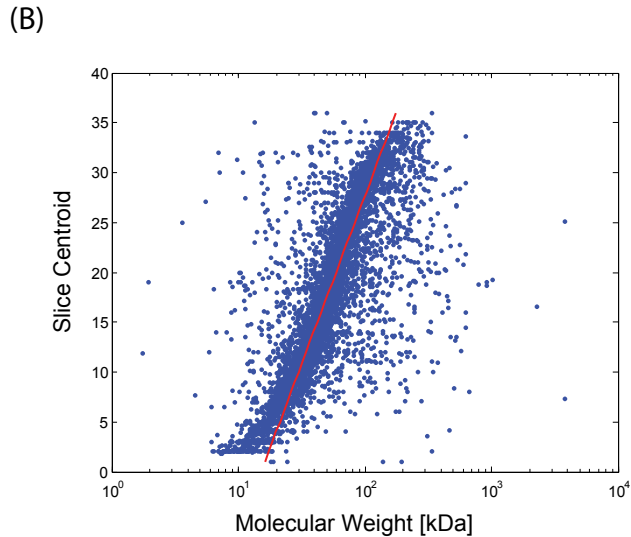

**Figure S1: Background information on the experiments and algorithm.**

**A.** Forward and reverse SILAC labeling. Both forward and reverse labeling resulted in the same ratio pattern for the cleaved substrate PARP1. **B.** Correlation of slice numbers to molecular weights. Based on all detected proteins of an experiment we calibrated approximate molecular weight regions along the gel. The red line is the regression line for the calculation of the right y-axis in the 3D cleavage plot.

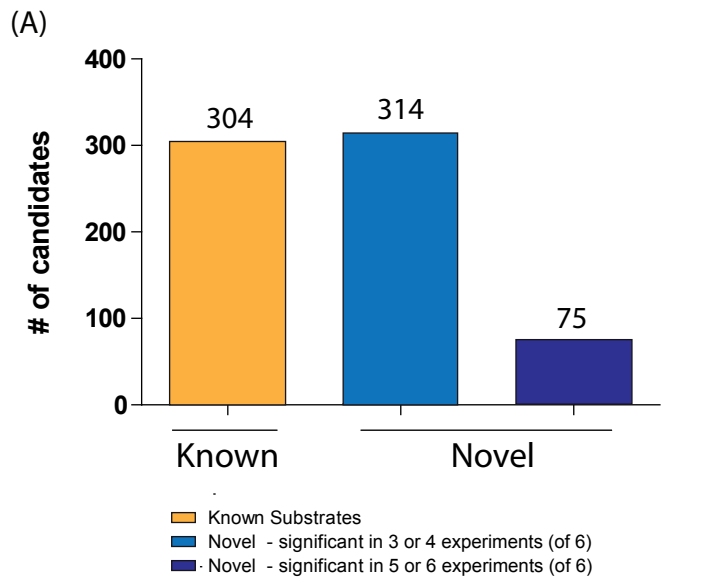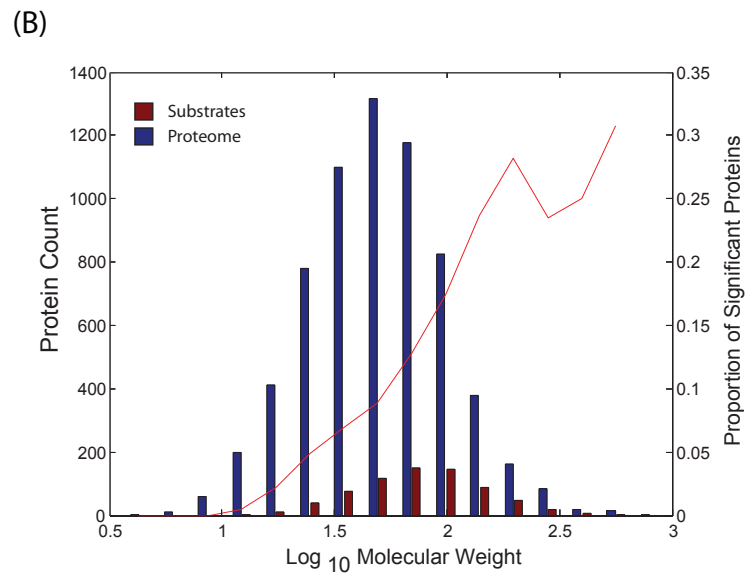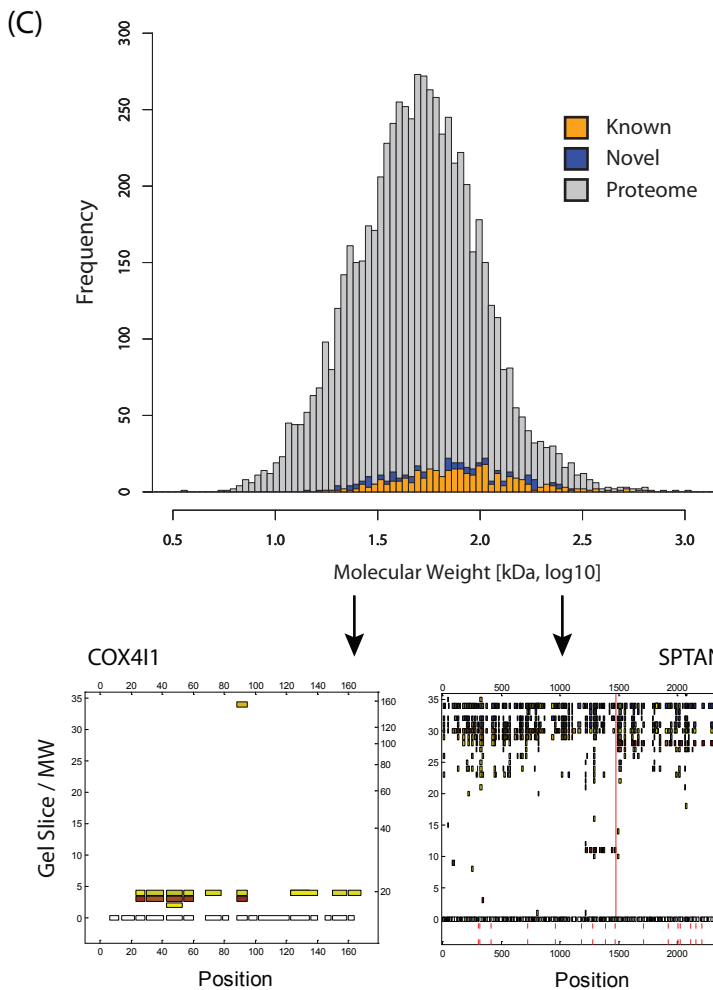

### Figure S2: Characterization of the substrate population.

**A.** Characterization of identified substrates. Numbers of known and novel substrates are depicted. Novel substrates are subdivided depending on their number of significant identifications as cleavage substrate in all six experiments. Only substrates identified significantly at least three times are considered for the analysis.

**B.** Coverage of the molecular weight region by the cleaved substrates. Whole proteome data as well as substrates are plotted. The red line indicates the proportion of significant substrates within the different molecular weight regions in comparison to the whole proteome.

**C.** Distribution of molecular weights spanned by the whole proteome experiment and by the cleavage substrates. Proteome data are plotted according to their molecular weight, underlying known and novel substrates are highlighted. Substrates are generally detected between 20 kDa and 250 kDa. Representative examples of the lower and higher molecular weight regions are depicted.

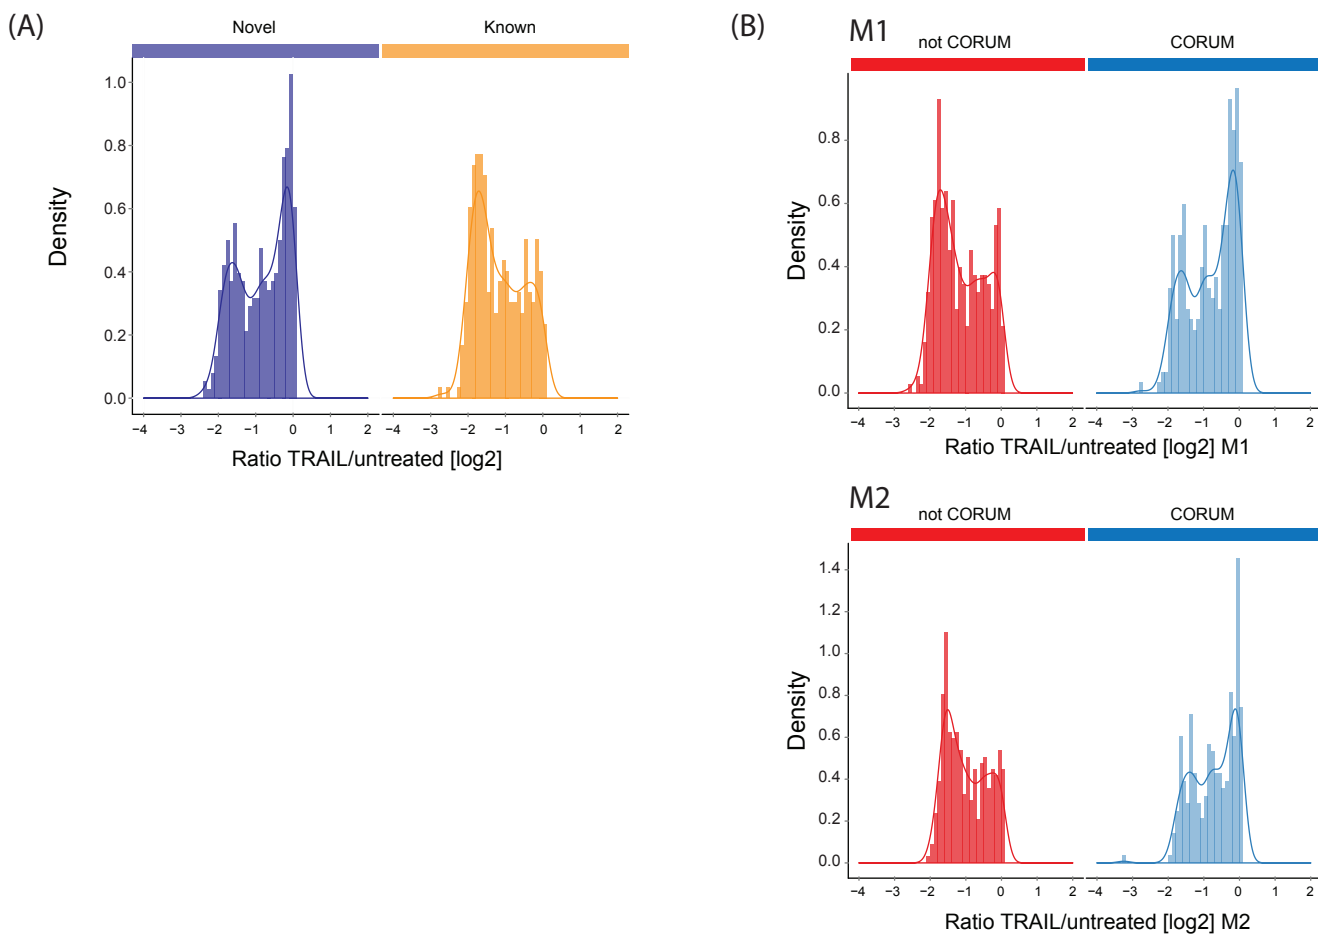

**Figure S3: Investigation of the uncleaved ratio distribution of cleaved substrates.**

**A.** Uncleaved ratio distribution of all cleaved substrates split for novel and known substrates. The uncleaved ratio distribution indicates a tendency of novel substrates to be located in the right hand peak in comparison to the population of known substrates. **B.** Separation of the uncleaved ratio population for CORUM and non-CORUM substrates within the experiments M1 and M2. Substrates annotated to CORUM show tendencies to be located in the right hand peak.

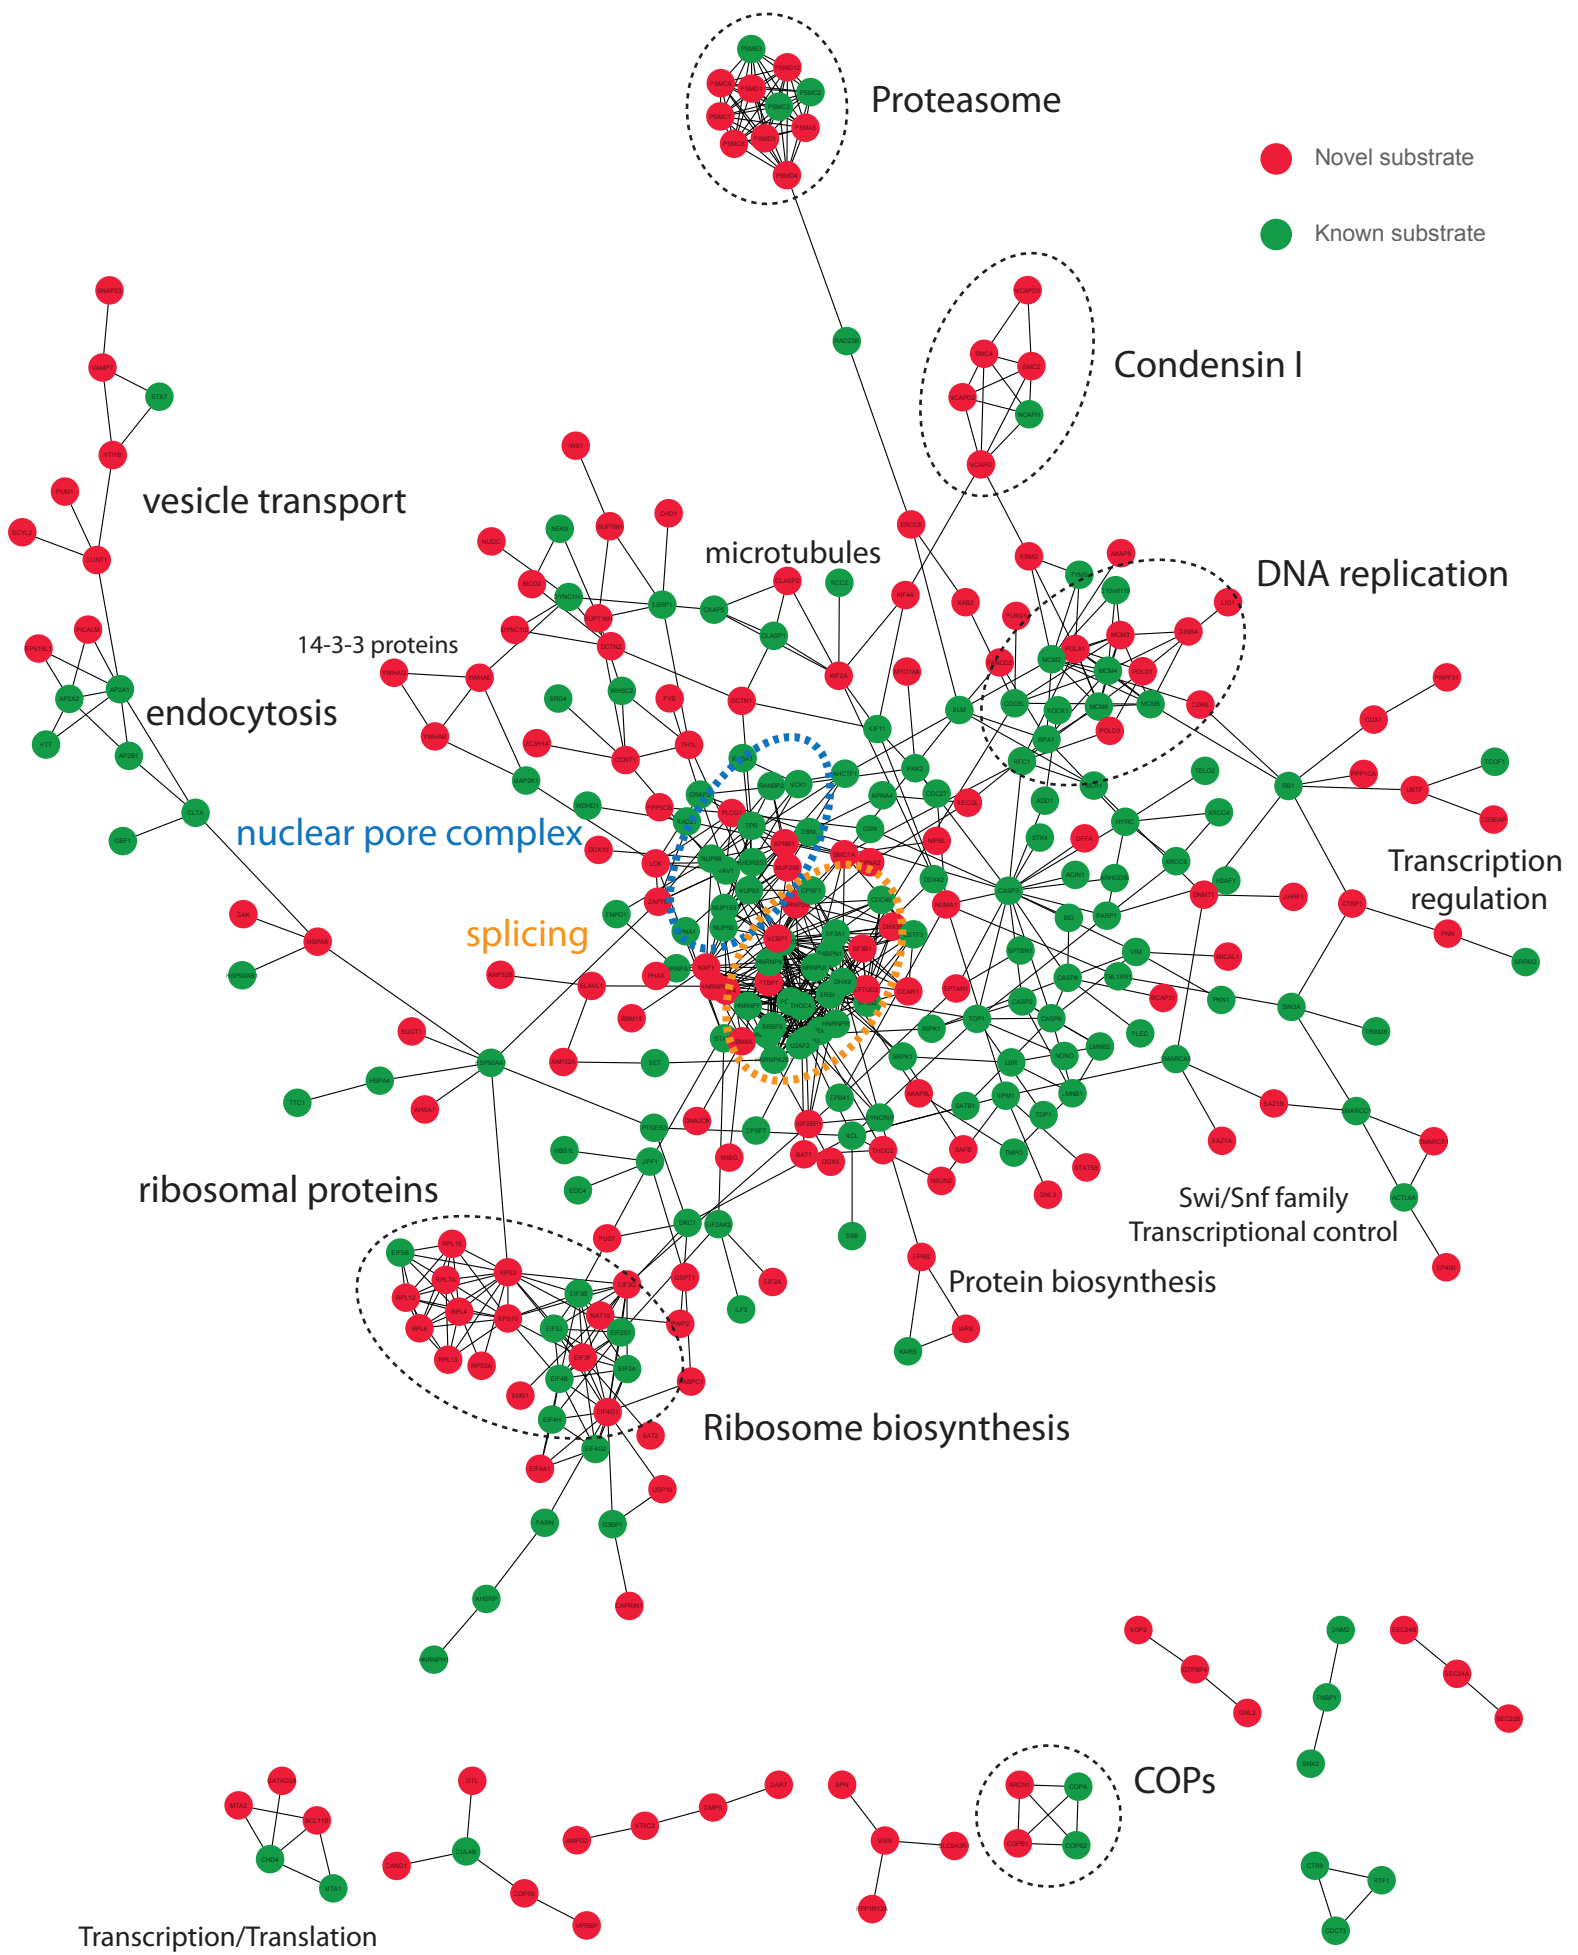

**Figure S4: STRING analysis of known and novel substrates.**

Substrates were uploaded to STRING and interactions were represented in the Cytoscape environment. Novel substrates are indicated in red, known substrates in green. Categories spanned by several interacting proteins are named within the graphic and encircled for clarity if necessary.

## NCAPD2

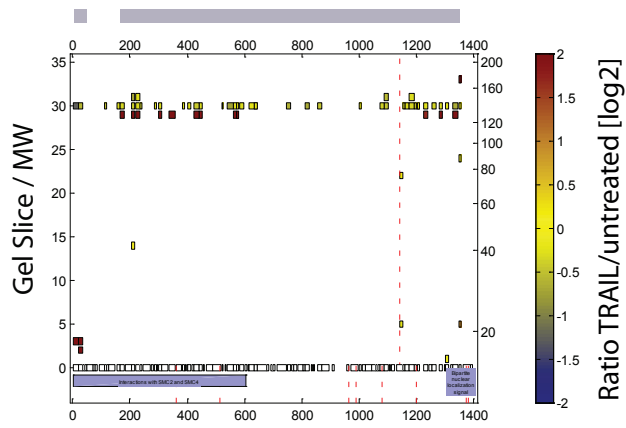

## NCAPG

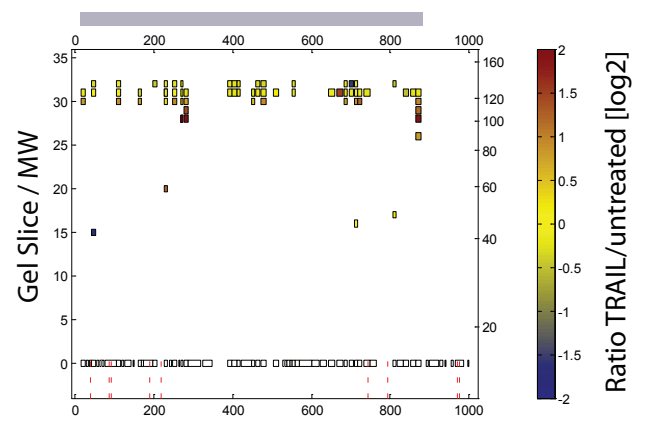

## SMC4

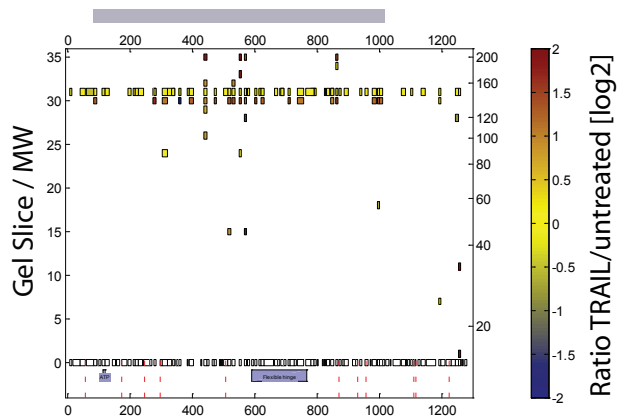

### Figure S5: 3D cleavage plots for components of the condensin I complex.

Components from the condensin I complex not displayed in Fig. 7A are plotted. All proteins are cleavage substrates, cleavage fragments are indicated on top of the graph with grey bars.

# 19S regulatory particle (RP)

## PSMD12,RPN5

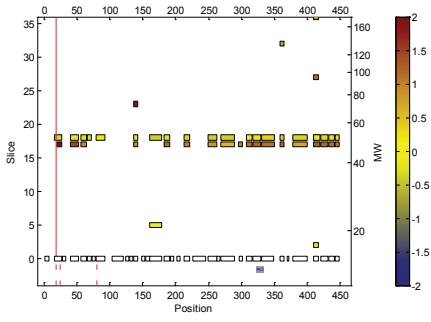

## PSMD3,RPN3

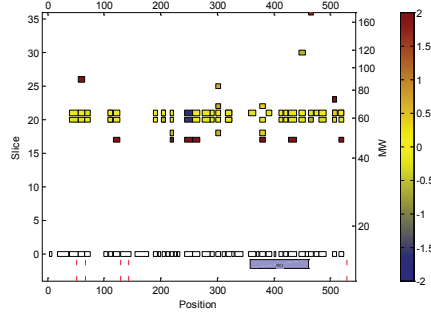

## PSMD4,RPN10

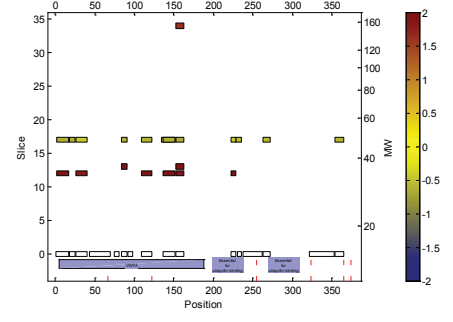

## PSMD1,RPN2

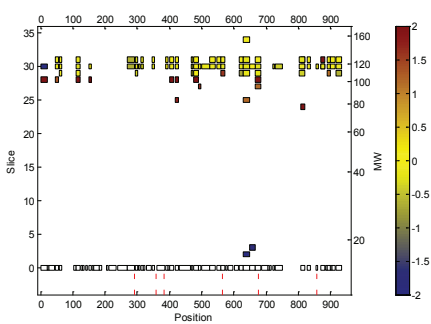

## PSMC2,RPT1

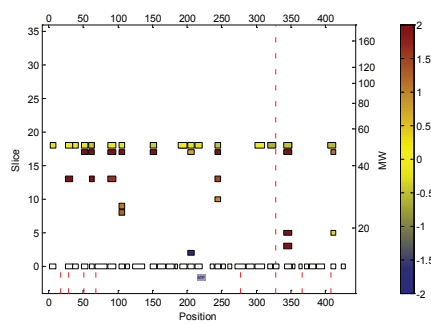

## PSMC3,RPT5

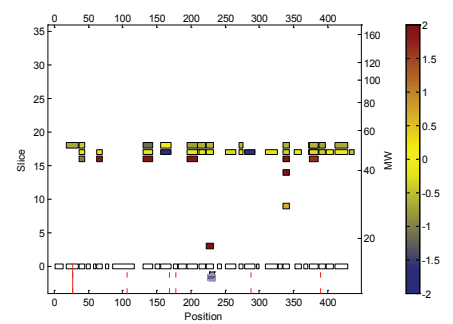

## PSMC1,RPT2

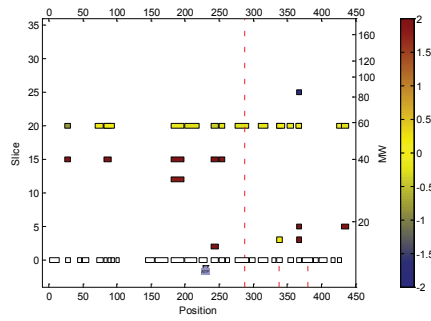

## PSMC5,RPT6

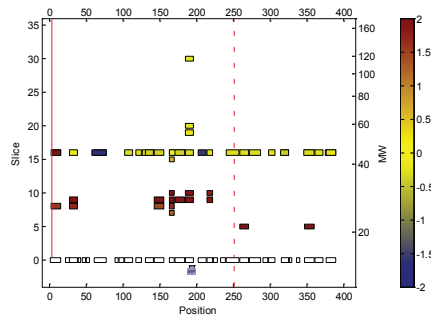

## PSMC6,RPT4

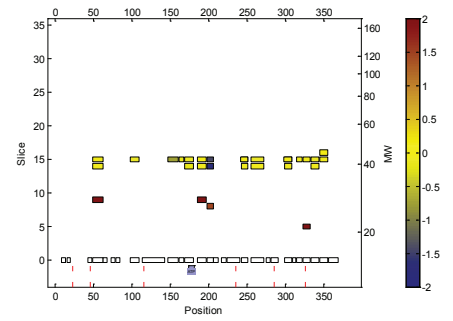

# PA-28-gamma

## PSME3

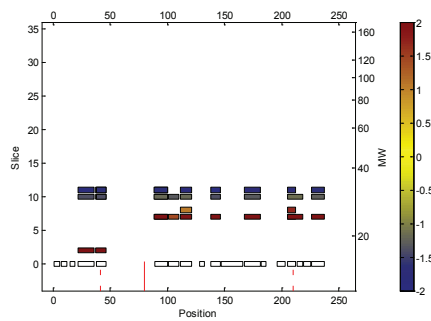

# Core particle (20S proteasome)

## PSMA5

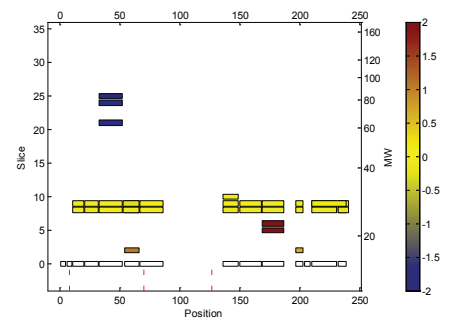



**Figure S6: Cleavage of proteasomal proteins.**

Cleaved proteins from the proteasome complex are depicted via their 3D cleavage plots. Proteins from both the 19S regulatory particle as well as the 20S core particle were identified as cleaved substrates. Most substrates show low stoichiometries in their uncleaved region.

# Supplemental Information

## Instructions on how to use MaxQB for visualizing and extracting cleavage information.

Starting from the project page, each of the experiments can be selected (1). Moreover, a list of proteins with an explicit cleavage information is provided (2).

**TRAIL induced Apoptosis**

standard SILAC experiment

Identification of cleaved substrates

The extrinsic, extracellular ligand induced pathway of apoptosis is executed by caspase protease cascades activating downstream effectors by site-directed proteolysis. Here we identify proteome changes upon induction of apoptosis by the cytokine Tumor Necrosis Factor Related Apoptosis Inducing Ligand (TRAIL) in a Jurkat T cell line. We detect caspase-dependent cleavage substrates by quantifying protein intensities before and after TRAIL induction in SDS gel slices. Apoptotic protein cleavage events are identified by a characteristic SILAC ratio pattern across gel slices that result from differential migration of the cleaved versus the uncleaved protein. We apply a statistical test to define apoptotic substrates in the proteome. Our approach identified more than 650 of these cleaved proteins in response to TRAIL-induced apoptosis, including many previously unknown substrates and cleavage sites. Inhibitor-treatment combined with triple-SILAC demonstrated that the detected cleavage events are caspase-dependent. Proteins located in human organelles such as mitochondria and endoplasmic reticulum were significantly under-represented in the substrate population. Interestingly, caspase cleavage is generally found not only in one but several members of stable complexes, but often with lower stoichiometry. For instance, all five proteins of the condensin I complex were cleaved upon TRAIL treatment. The apoptotic substrate proteome data can be accessed and visualized in the MaxQB database and may prove useful for basic and clinical research into TRAIL-induced apoptosis. The technology described here is extensible to a wide range of other proteolytic cleavage events.

Stoehr Gabi, Schaab Christoph, Gramann Johannes, Mann Matthias: "A SILAC-based approach identifies substrates of caspase-dependent cleavage upon TRAIL-induced apoptosis", MCP submitted

Show proteins with cleavage events ← 2

| Experiment Series | Name          | Description               | Create |
|-------------------|---------------|---------------------------|--------|
| 1                 | TRIPLE Inh M2 | TRIPLE SILAC exp 10/09/20 |        |
| 2                 | TRIPLE Inh M1 | TRIPLE SILAC exp 10/09/20 |        |
| 3                 | TRIPLE Inh M3 | TRIPLE SILAC exp 10/09/20 |        |

For each experiment general information on the experiment is provided.

### Experiment Series TRIPLE Inh M3

| Details              | QC                                                                                               | Cleaved Proteins | Protein Groups | Peptides | Evidences |
|----------------------|--------------------------------------------------------------------------------------------------|------------------|----------------|----------|-----------|
| Type                 | LC-MS/MS Experiment                                                                              |                  |                |          |           |
| Name                 | TRIPLE Inh M3                                                                                    |                  |                |          |           |
| Description          | TRIPLE SILAC experiment in Jurkat T cells; L = untreated; M = 5h TRAIL + z-VAD-FMK; H = 5h TRAIL |                  |                |          |           |
| Project              | Gabi Apoptosis                                                                                   |                  |                |          |           |
| Experimentalist      | Gabi Stoehr                                                                                      |                  |                |          |           |
| Labeling Method      | SILAC                                                                                            |                  |                |          |           |
| Enrichment           | no Enrichment                                                                                    |                  |                |          |           |
| Protease             | Trypsin/P                                                                                        |                  |                |          |           |
| Separation           | SDS-PAGE                                                                                         |                  |                |          |           |
| LC Gradient          | min                                                                                              |                  |                |          |           |
| Column Material      | 3.0 µm                                                                                           |                  |                |          |           |
| Column Length        | 15.0 cm                                                                                          |                  |                |          |           |
| Fragmentation Method |                                                                                                  |                  |                |          |           |
| LC-MS/MS Machine     | LTQ Orbitrap Velos                                                                               |                  |                |          |           |
| Created              | 12/09/11 by schaab                                                                               |                  |                |          |           |
| Raw Files            | Apoptosis_Gabi/TRIPLE_Inh_M3_txt                                                                 |                  |                |          |           |

**Experiments**

|   | Name | Cellline | Description |
|---|------|----------|-------------|
| 0 | E1   |          |             |
| 1 | E10  |          |             |
| 2 | E11  |          |             |
| 3 | E12  |          |             |
| 4 | E13  |          |             |

A list of the cleaved proteins can be accessed via the “Cleaved Proteins” tab including cleavage information on the single entries (p-value, FDR, ratio of cleaved peptides, ...) (1).

Specific proteins can be searched by first clicking on the “Search” button at the bottom of the table (2). Each column can then be search for a specific term.

MaxQB - The MaxQuant DataBase

Home Projects Search Tools Login Contact

Experiment Series TRIPLE Inh M3

Details QC Cleaved Proteins Protein Groups Peptides Evidences

| Cleaved Proteins ID | Protein IDs                                         | Gene Names                      | Leading Protein ID | Leading Gene Name     | Leading Protein Name                   | Known Substrate | Detected Cleavage Site | Cleavage p-Value    | Cleavage fdr       | Ratio Cleaved Peptides | Ratio Uncleaved Peptide |
|---------------------|-----------------------------------------------------|---------------------------------|--------------------|-----------------------|----------------------------------------|-----------------|------------------------|---------------------|--------------------|------------------------|-------------------------|
| 4328                | Q4LE64, Q14980, Q9BTE                               | NUMA1 variant protein, NUQ4LE64 |                    | NUMA1 variant protein |                                        | no              | 0                      | 0                   | 1.58932129363276   | -0.37502334897691      |                         |
| 5608                | P40855, E9PBB5, P40855                              | PEX19, PEX19, PEX-P40855        |                    | PEX19                 | Peroxisomal biogenesis factor 19       | no              | 0.035                  | 0.3991292134031461  | 2.139281765762556  | -1.91537661053458      |                         |
| 2264                | P20936, P20936-2, B4DT                              | RASA1, RASA1                    | P20936             | RASA1                 | Ras GTPase-activating protein 1        | yes             | 0                      | 0                   | 2.35444408209437   | -1.7584641106292       |                         |
| 4657                | O60524, O60524-2                                    | NEMF, NEMF                      | O60524             | NEMF                  | Nuclear export mediator factor 1       | no              | 0                      | 0                   | 2.59130845029964   | -1.93698660043571      |                         |
| 131                 | Q08170, B4CEMB                                      | SRSF4                           | Q08170             | SRSF4                 | Serine/arginine-rich splicing factor 4 | no              | 0.002                  | 0.00423404255319149 | 1.79136740170787   | -0.156192215055628     |                         |
| 979                 | IF10009982, Q9Y2W6                                  | TDRKH, TDRKH, TDRKH, TDRKH      | IF10009982         | TDRKH                 | TSOFORM 1 OF TUDOR ANK                 | no              | 0                      | 0                   | 2.58070866409789   | -1.3905169979634       |                         |
| 6369                | Q12739, B4D9W9                                      | TYRPF3                          | Q12739             | TYRPF3                | TYR domain family protein              | yes             | 168                    | 0                   | 2.2766910031114    | -1.17906079429701      |                         |
| 4757                | E9H677, P52594, P52594                              | AGF1, AGF1, ALESHK7             |                    | AGF1                  |                                        | no              | 0.003                  | 0.0056056338028169  | 1.42572950241939   | -1.97342540216991      |                         |
| 2548                | IF10003099, Q12982-2, BNP2, BNP2, BNP2, BNP2        | BNP2, BNP2, BNP2, BNP2          | IF10003099         | BNP2                  | BCL2/ADENOVIRUS E1B 1                  | no              | 0.006                  | 0.0092468538281413  | 2.9314816345582    | -1.7645713455094       |                         |
| 9238                | B723U7, Q9ULV3, Q5SYVC12, C1Z1, C1Z1, C1Z1, (B723U7 |                                 |                    |                       |                                        | no              | 0.008                  | 0.0114121863799203  | 2.3502538802562    | -1.82908647816948      |                         |
| 2549                | O40563, A9XU13, IF1007                              | CCNT1, CCNT1, CCNT1, CCNT1      | O40563             | CCNT1                 | Cyclin-T1                              | no              | 47                     | 0.005               | 0.0080484295845998 | 2.4695511177522        | -1.50289367588682       |
| 2424                | P14921, Q6N087, P14921                              | ETS1, ETS1, ETS1, ETS1          | P14921             | ETS1                  | Protein C-ets-1                        | no              | 0.001                  | 0.0027590976682042  | 1.56532283568238   | -1.58327810788659      |                         |
| 1834                | P18189, Q55207, Q55207                              | HDGF, HDGF, HDGF, HDGF          | P18189             | HDGF                  | Hepatooma-derived growth factor        | no              | 0.011                  | 0.014605504587156   | 2.04291311549538   | -0.0105112292669604    |                         |
| 2699                | Q5T126, Q5T126, E9PCH                               | FUM1, FUM1, FUM1, FUM1          | Q5T126             | FUM1                  |                                        | no              | 0.003                  | 0.0056056338028169  | 1.36429954129575   | -1.35288302347412      |                         |
| 2698                | Q14CA3, Q14649, Q5EKTR12, TRIP12, TRIP12, TQ14CA3   |                                 |                    | TRIP12                |                                        | no              | 0.001                  | 0.0027590976682042  | 1.44245789654969   | -1.0901860231177       |                         |
| 8696                | E9P9H1, Q102W5, Q102W5                              | E1F4G1, E1F4G1, E1F4G1, E1F4G1  |                    | E1F4G1                |                                        | no              | 0                      | 0                   | 1.92367935654827   | -1.29441999966676      |                         |
| 4784                | Q12619, B4CT54, IF1006                              | HHR23B, HHR23B, HHR23B, HHR23B  | Q12619             | HHR23B                | Minor histocompatibility protein       | no              | 0                      | 0                   | 1.89976064239532   | -1.9564095987211       |                         |
| 6488                | A9N051, Q13813-2, Q13813-2, SPTAN1, SPTAN1, A9N051  |                                 |                    | SPTAN1                |                                        | no              | 1475                   | 0                   | 0                  | 1.58035647262302       | -1.75630676455551       |
| 262                 | B4DT57, Q9Y860, E9PCB                               | STK24, STK24, STK24, STK24      | B4DT57             | STK24                 |                                        | yes             | 0.002                  | 0.00423404255319149 | 2.42067599671289   | -1.1390642275353       |                         |
| 4404                | Q92734, Q5E9V1, Q5E9V1                              | TFG, TFG/ALK fusion, Q92734     |                    | TFG                   | Protein TFG                            | no              | 0.008                  | 0.0114121863799203  | 1.90406283563285   | -1.82060795482012      |                         |
| 5835                | Q2M218, Q2M218-2, E9PAAK1, AAK1, AAK1               |                                 | Q2M218             | AAK1                  | AP2-associated protein kinases         | no              | 0                      | 0                   | 1.40073100863005   | -1.86484942413679      |                         |

Search Clear Columns Excel View 1 - 60 of 691

When selecting one ID in the “Cleaved proteins” table, further information about the protein within the experiment is provided.

MaxQB - The MaxQuant DataBase

Home Projects Search Tools Login Contact

ProteinGroup TRIPLE Inh M3 - 4328

Proteins Cleavage Peptides Posttranslational Modifications Evidences Experiments

| Source ID       | Source Database | Source Version | Uniprot ID | Protein Name                 | Gene Name | Synonyms        | Description               | Molecular Weight | Unique Peptides | Razor Peptides | Total Peptides |
|-----------------|-----------------|----------------|------------|------------------------------|-----------|-----------------|---------------------------|------------------|-----------------|----------------|----------------|
| Q4LE64          | UNIPROT HUMAN   | 2012_07        | Q4LE64     | NUMA1 variant protein        | NUMA1     | NUMA            | May be a structural compo | 238.859          | 1               | 92             | 92             |
| Q14980          | UNIPROT HUMAN   | 2012_07        | Q14980     | Nuclear mitotic apparatus    | NUMA1     | NUMA            |                           | 238.26           | 1               | 92             | 92             |
| Q9BTE9          | UNIPROT HUMAN   | 2012_07        | Q9BTE9     |                              | NUMA1     |                 |                           | 109.279          | 0               | 41             | 41             |
| Q15417          | UNIPROT HUMAN   | 2012_07        | Q15417     | Trinucleotide repeat-contain | TNRC18    | CAGL79_KIAA1056 |                           | 314.519          | 0               | 1              | 1              |
| IF10093934      | IFI HUMAN       | 3.38           |            | UNCHARACTERIZED PROT         | TNRC18    |                 |                           | 302.845          | 0               | 1              | 1              |
| IF100479962     | IFI HUMAN       | 3.38           |            | MYOSIN-VB                    | MYO5B     |                 |                           | 213.756          | 0               | 1              | 1              |
| A9MSW5          | UNIPROT HUMAN   | 2011_10        | A9MSW5     |                              | TNRC18    |                 |                           | 140.463          | 0               | 1              | 1              |
| Q9H6Y6          | UNIPROT HUMAN   | 2012_07        | Q9H6Y6     |                              | MYO5B     |                 |                           | 111.759          | 0               | 1              | 1              |
| REV_IF100930364 | REVERSE         |                |            |                              |           |                 |                           | 0                | 1               | 1              | 1              |
| REV_IF100806473 | REVERSE         |                |            |                              |           |                 |                           | 0                | 1               | 1              | 1              |
| IF100847324     | IFI HUMAN       | 3.38           |            | 40 KDA PROTEIN               |           |                 |                           | 39.565           | 0               | 1              | 1              |
| CKPFB           | UNIPROT HUMAN   | 15.14          | CKPFB      |                              | TNRC18    |                 |                           | 17.465           | 0               | 1              | 1              |

Columns Excel View 1 - 12 of 12

The “Cleavage” table contains all information about the cleavage of this protein within the specific experiment including statistics of the cleavage and the 3D cleavage plot.

## ProteinGroup TRIPLE Inh M3 - 5633

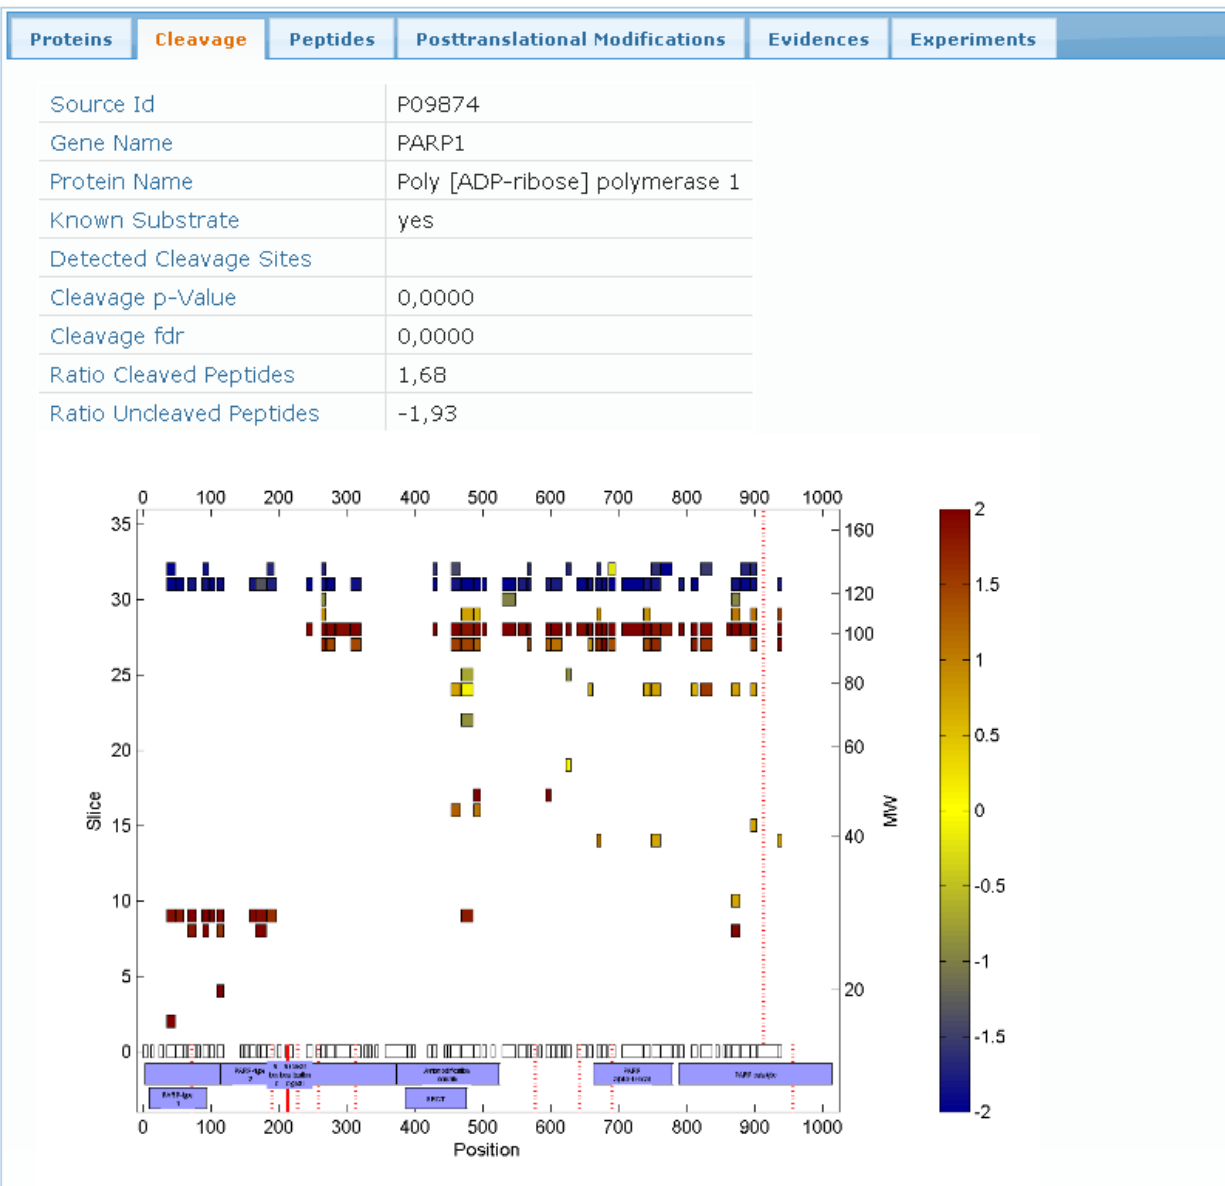

Selecting the Source Id in the “Proteins” tab or by selecting the Protein Id at the very beginning leads to the general protein information.

**MaxQB - The MaxQuant DataBase**

Home | Projects | Search | Tools | Login | Contact

**Protein P09874 - Poly [ADP-ribose] polymerase 1**

| Details        | Sequence                                                                                                                                                                                                                                                                                                                                                                                                                                                                                                                                                                                                                                                                                                                                                              | Sequence Coverage | Peptides | Modifications | Experiment Series | PrEST | Cleavage | Literature |
|----------------|-----------------------------------------------------------------------------------------------------------------------------------------------------------------------------------------------------------------------------------------------------------------------------------------------------------------------------------------------------------------------------------------------------------------------------------------------------------------------------------------------------------------------------------------------------------------------------------------------------------------------------------------------------------------------------------------------------------------------------------------------------------------------|-------------------|----------|---------------|-------------------|-------|----------|------------|
| Organism       | Human                                                                                                                                                                                                                                                                                                                                                                                                                                                                                                                                                                                                                                                                                                                                                                 |                   |          |               |                   |       |          |            |
| Protein Name   | Poly [ADP-ribose] polymerase 1                                                                                                                                                                                                                                                                                                                                                                                                                                                                                                                                                                                                                                                                                                                                        |                   |          |               |                   |       |          |            |
| Gene Names     | PARP1 (ADPRT,PPOL)                                                                                                                                                                                                                                                                                                                                                                                                                                                                                                                                                                                                                                                                                                                                                    |                   |          |               |                   |       |          |            |
| Description    | Involved in the base excision repair (BER) pathway, by catalyzing the poly(ADP-ribosylation) of a limited number of acceptor proteins involved in chromatin architecture and in DNA metabolism. This modification follows DNA damages and appears as an obligatory step in a detection/signaling pathway leading to the repair of DNA strand breaks. Mediates the poly(ADP-ribosylation) of APLF and CTRF. Positively regulates the transcription of MTS1 and negatively regulates the transcription of MTS2/TIP150. With EEP1A1 and TRK, forms a complex that acts as a T-helper 1 (Th1) cell-specific transcription factor and binds the promoter of IFN-gamma to directly regulate its transcription, and is thus involved importantly in Th1 cytokine production. |                   |          |               |                   |       |          |            |
| Location       | Chromosome 1 : 226548392-226595774                                                                                                                                                                                                                                                                                                                                                                                                                                                                                                                                                                                                                                                                                                                                    |                   |          |               |                   |       |          |            |
| Source         | UNIPROT HUMAN Version: 2012_07 Id: P09874 ★                                                                                                                                                                                                                                                                                                                                                                                                                                                                                                                                                                                                                                                                                                                           |                   |          |               |                   |       |          |            |
| Global FDR     | 0                                                                                                                                                                                                                                                                                                                                                                                                                                                                                                                                                                                                                                                                                                                                                                     |                   |          |               |                   |       |          |            |
| Other Sources  | <p>IPi HUMAN Version: 3.26 Id: IPi00953994<br/>Gene Name: PARP1<br/>Protein Name: POLY [ADP-RIBOSE] POLYMERASE 1</p> <p>IPi HUMAN Version: 3.26 Id: IPi00292802<br/>Gene Name: PARP1<br/>Protein Name: POLY [ADP-RIBOSE] POLYMERASE 1</p> <p>UNIPROT HUMAN Version: 15.6 Id: B1JANJ4<br/>Gene Name: PARP1</p> <p>ENSEMBL HUMAN Version: 68 Id: ENSP00000355759</p> <p>IPi HUMAN Version: 3.26 Id: IPi00449049<br/>Gene Name: PARP1<br/>Protein Name: POLY [ADP-RIBOSE] POLYMERASE 1</p>                                                                                                                                                                                                                                                                               |                   |          |               |                   |       |          |            |
| External Links | <a href="#">Uniprot</a><br><a href="#">Kinexus PhosphoNet</a>                                                                                                                                                                                                                                                                                                                                                                                                                                                                                                                                                                                                                                                                                                         |                   |          |               |                   |       |          |            |

Information as e.g. general sequence coverages over all stored data can be accessed (for more information on general MaxQB features refer to the publication on MaxQB: Schaab et al., MCP, 2012).

**MaxQB - The MaxQuant DataBase**

Home | Projects | Search | Tools | Login | Contact

**Protein P09874 - Poly [ADP-ribose] polymerase 1**

| Details                                                                                                                                                                                                                                                                                                                                                                                                        | Sequence | Sequence Coverage | Peptides | Modifications | Experiment Series | PrEST | Cleavage | Literature |
|----------------------------------------------------------------------------------------------------------------------------------------------------------------------------------------------------------------------------------------------------------------------------------------------------------------------------------------------------------------------------------------------------------------|----------|-------------------|----------|---------------|-------------------|-------|----------|------------|
|                                                                                                                                                                                                                                                                                                                                                                                                                |          |                   |          |               |                   |       |          |            |
| <p>Export image as <a href="#">SVG</a>, <a href="#">PNG</a>, or <a href="#">PDF</a></p>                                                                                                                                                                                                                                                                                                                        |          |                   |          |               |                   |       |          |            |
| <p><b>Display Options</b></p> <p>Protease: <input type="text" value="Trypsin/P"/></p> <p>Show peptides per experiment series: <input type="checkbox"/></p> <p>Color peptides by intensity: <input type="checkbox"/></p> <p>Show non-proteotypic peptides: <input type="checkbox"/></p> <p>Proteolytic peptides with masses between 600 and 4000 Da are shown as grey boxes.</p> <p><a href="#">Refresh</a></p> |          |                   |          |               |                   |       |          |            |

Again cleavage information can be accessed, this time, not based on a single experiment, but on all experiments. On top, information from literature about known cleavage sites is displayed. The hyperlink guides to the reference. Below, information derived from our experiments is displayed for all experiments – the 3D cleavage plot, cleavage site information as well as statistics on the cleavage per experiment.

### Protein P09874 - Poly [ADP-ribose] polymerase 1

|         |          |                   |          |               |                   |       |          |            |
|---------|----------|-------------------|----------|---------------|-------------------|-------|----------|------------|
| Details | Sequence | Sequence Coverage | Peptides | Modifications | Experiment Series | PrEST | Cleavage | Literature |
|---------|----------|-------------------|----------|---------------|-------------------|-------|----------|------------|

#### Cleavage Sites from Literature

| Pos | Source                 |
|-----|------------------------|
| 214 | <a href="#">CASBAH</a> |

#### Cleavage Sites determined by Stoehr et al.

|                          |               |
|--------------------------|---------------|
| Experiment Series        | TRIPLE Inh M1 |
| Protein Group            | 5518          |
| Detected Cleavage Sites  |               |
| Cleavage p-Value         | 0,0000        |
| Cleavage fdr             | 0,0000        |
| Ratio Cleaved Peptides   | 1,65          |
| Ratio Uncleaved Peptides | -1,95         |

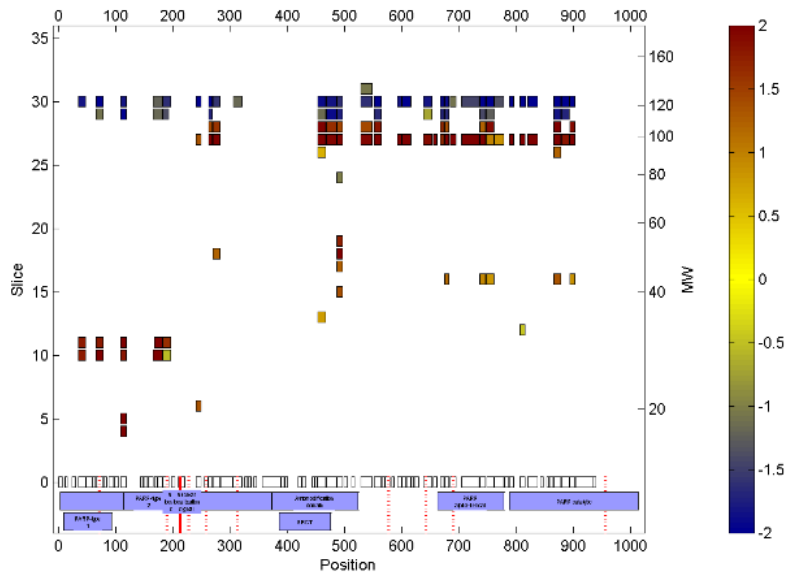

Proteins can also be searched directly via the “Search -> Proteins” function. By selecting the Source Id, general protein information will be obtained. In case the protein is known as cleavage substrate but was not identified by our approach, the information about the reference will still be provided in the “Cleavage” tab. In case no “Cleavage” tab is provided, the protein is not known to be a cleavage substrate.

**MaxQB - The MaxQuant DataBase**

Home | Projects | **Search** | Tools | Login | Contact

Max Planck Institute of Biochemistry

### Protein Query

Search protein by gene or protein name:

Query results

6 protein entries found.

| Source Id *       | Source Database | Source Version | Protein Name                    | Gene Name | Synonyms           | Description                  | Organism | Reviewed | Molecular Weight | Chromosome | Start Position |
|-------------------|-----------------|----------------|---------------------------------|-----------|--------------------|------------------------------|----------|----------|------------------|------------|----------------|
| P09874            | UNIPROT HUMAN   | 2012_07        | Poly [ADP-ribose] polymer PARP1 | PARP1     | ADPRT,PPOL         | Involved in the base exci    | Human    | true     | 113.084          | 1          | 226548392      |
| KW11_Step3_001603 | MPI-XENO        | 03.2012        | parp1                           | parp1     |                    |                              | Xenopus  | true     | 112.76976        |            |                |
| KW11_Step0_010162 | MPI-XENO        | 03.2012        | parp1*                          | MGC115350 |                    |                              | Xenopus  | true     | 66.09867         |            |                |
| KW11_Step0_048397 | MPI-XENO        | 03.2012        | parp1*                          | MGC115350 |                    |                              | Xenopus  | true     | 17.30115         |            |                |
| P11103            | UNIPROT MOUSE   | 2012_07        | Poly [ADP-ribose] polymer Parp1 | Parp1     | Adprp,Adprt,Adprt1 | Positively regulates the tra | Mouse    | true     | 113.1            |            |                |
| P11103-2          | UNIPROT MOUSE   | 2012_07        | Poly [ADP-ribose] polymer Parp1 | Parp1     | Adprp,Adprt,Adprt1 | Positively regulates the tra | Mouse    | true     | 55.237           |            |                |

Columns | Excel | View 1 - 6 of 6

Advanced search

© 2008-2012 Max-Planck-Institut für Biochemie. All rights reserved. Version 2
